# Supplementary material
Source: PubMed Central journal article supplement (PMC1635433)
Supplement: bj4000033add.pdf [file bj4000033add.pdf]

# Supplementary Figure 1., Suzuki *et al.*

|               |      |                                                                                                                                                             |
|---------------|------|-------------------------------------------------------------------------------------------------------------------------------------------------------------|
| Hsapiens      | 1    | -----MAAAPFLKHWRITTLERVEKVFSPYIYFTDNLGRRLFGDSCPVYIYSSFLTPERLPYEAQRDRFPAQVGDSPGPTWWTWCFRVELITPEAVWQGEVHLWESDGEGLVWRDGEVQGLTKEGKTSYLLDRLEGRDPR                |
| Mmusculus     | 1    | -----MAAAPFLKHWRITTLERVEKVFSPYIYFTDNLGRRLFGDSCPVYIYSSFLTPERLPYEAQRDRFPAQVGDSPGPTWWTWCFRVELITPEAVWQGEVHLWESDGEGLVWRDGEVQGLTKEGKTSYLLSERLNASDPR               |
| Rnorvegicus   | 1    | -----MAAAPFLKHWRITTLERVEKVFSPYIYFTDNLGRRLFGDSCPVYIYSSFLTPERLPYEAQRDRFPAQVGDSPGPTWWTWCFRVELITPEAVWQGEVHLWESDGEGLVWRDGEVQGLTKEGKTSYLLSERLNAADPR               |
| Gallus        | 1    | -----MRSSGVAALVLRRTTLERVEKVFSAIYFTDNLGRRLFGDSCPVYIYSSFLTPERLPYEAQRDRFPAQVGDSPGPTWWTWCFRVELITPEAVWQGEVHLWESDGEGLVWRDGEVQGLTKEGKTSYLLSSKKEIPEH                |
| Xlaevis       | 1    | MDVSPNIQSSRSDFSYSSFFLQNRRTTLERVEKVFSEIYFTDNLGRRLFGDSCPVYIYSSFLTPERLPYEAQRDRFPAQVGDSPGPTWWTWCFRVELITPEAVWQGEVHLWESDGEGLVWRDGEVQGLTKEGKTSYLLTERKSDQDQ         |
| Tnigroviridis | 1    | -----MFCQPLVKNRRTTLERVEKVFSAIYFTDNLGRRLFGDSCPVYIYSSFLTPERLPYEAQRDRFPAQVGDSPGPTWWTWCFRVELITPEAVWQGEVHLWESDGEGLVWRDGEVQGLTKEGKTSYLLSERLKEIPEH                 |
| consensus     | 1    | maaapmLKh RTtLERvEKVFSpiYFTdCNLRGrLfg scpvtvss fLtperlpye avq f paqvqdsfgptwwtwcfRvEl ipedWvGkEVHLwEsdGEGLVWRDgePVQGLtKEGkTSyLLserLkeIpeH                   |
|               |      |                                                                                                                                                             |
| Hsapiens      | 146  | SLTYVEVACNGLGAGGSMIAADPEKMFQLSKAEVYFHRDVFHLLVDLELLGLAKGLGDNQRSFQALYANQMNVCDAQPETPAAALASIFFGQGGESQHTIHAMGHCHIDTAWLWPFKTVRKCARSWITAVQLMER---NPE               |
| Mmusculus     | 145  | SLTYVEVACNGLGAGGSMIAADPEKMFQLSKAEVYFHRDVFHLLVDLELLGLAKGLGEDNQRSFQALYANQMNVCDAQPETPAAALASIFFGQGGESQHTIHAMGHCHIDTAWLWPFKTVRKCARSWITAVQLMER---NPE              |
| Rnorvegicus   | 145  | SLTYVEVACNGLGAGGSMIAADPEKMFQLSKAEVYFHRDVFHLLVDLELLGLAKGLGEDNQRSFQALYANQMNVCDAQPETPAAALASIFFGQGGESQHTIHAMGHCHIDTAWLWPFKTVRKCARSWITAVQLMER---NPE              |
| Gallus        | 108  | SLTYVEVACNGLGAGGSMIAADPEKMFQLSKAEVYFHRDVFHLLVDLELLGLAKGLGEDNQRSFQALYANQMNVCDAQPETPAAALASIFFGQGGESQHTIHAMGHCHIDTAWLWPFKTVRKCARSWITAVQLMER---NPE              |
| Xlaevis       | 162  | SLTYVEVACNGLGAGGSMIAADPEKMFQLSKAEVYFHRDVFHLLVDLELLGLAKGLGEDNQRSFQALYANQMNVCDAQPETPAAALASIFFGQGGESQHTIHAMGHCHIDTAWLWPFKTVRKCARSWITAVQLMER---NPE              |
| Tnigroviridis | 132  | SLTYVEVACNGLGAGGSMIAADPEKMFQLSKAEVYFHRDVFHLLVDLELLGLAKGLGEDNQRSFQALYANQMNVCDAQPETPAAALASIFFGQGGESQHTIHAMGHCHIDTAWLWPFKTVRKCARSWITAVQLMER---NPE              |
| consensus     | 162  | SltTYvEvACnGL GaG GSMIAAdDpekMfQlsrAeL vFHRDvHvLlVdLeLlLl iakGLgednQRsFQALyANqMnVnCDAQ PetfPaakaLasrFfGqH GeSQHtIhAmGHCHIDTawLwPfkTvrKcArSwitAvQLmer ---npd |
|               |      |                                                                                                                                                             |
| Hsapiens      | 293  | FIFACS-----QAQQLWIKSWYPLGYSRTOEACRGGQFVPGGTWEMDGNLPSGEMVRFQLOGNQFLQEQGKMCSEFWLPTDFGYSQAQLPQIMQGGCIKRFLTKLWSLWNSFPFHHTFWEGLDGSRLVLIHFP                       |
| Mmusculus     | 292  | FIFACS-----QAQQLWIKSWYPLGYSRTOEACRGGQFVPGGTWEMDGNLPSGEMVRFQLOGNQFLQEQGKMCSEFWLPTDFGYSQAQLPQIMQGGCIKRFLTKLWSLWNSFPFHHTFWEGLDGSRLVLIHFP                       |
| Rnorvegicus   | 292  | FIFACS-----QAQQLWIKSWYPLGYSRTOEACRGGQFVPGGTWEMDGNLPSGEMVRFQLOGNQFLQEQGKMCSEFWLPTDFGYSQAQLPQIMQGGCIKRFLTKLWSLWNSFPFHHTFWEGLDGSRLVLIHFP                       |
| Gallus        | 259  | FCATTO-----LAQQFEWISWYPLGYSRTOEACRGGQFVPGGTWEMDGNLPSGEMVRFQLOGNQFLQEQGKMCSEFWLPTDFGYSQAQLPQIMQGGCIKRFLTKLWSLWNSFPFHHTFWEGLDGSRLVLIHFP                       |
| Xlaevis       | 309  | FKFICS-----QAQQLWIKSWYPLGYSRTOEACRGGQFVPGGTWEMDGNLPSGEMVRFQLOGNQFLQEQGKMCSEFWLPTDFGYSQAQLPQIMQGGCIKRFLTKLWSLWNSFPFHHTFWEGLDGSRLVLIHFP                       |
| Tnigroviridis | 279  | FVFCQVTSHTSVCIQSPVCFVCSQQAQQLWIKSWYPLGYSRTOEACRGGQFVPGGTWEMDGNLPSGEMVRFQLOGNQFLQEQGKMCSEFWLPTDFGYSQAQLPQIMQGGCIKRFLTKLWSLWNSFPFHHTFWEGLDGSRLVLIHFP          |
| consensus     | 336  | Fifacs qAQQLeWksWYPLgYsRtoEacRgGqFvPggTWEmdGNLpSGEMvRFQlogNQfLqEQgKmcSEfWlPdTfGysaQLPQImqGgCIKRfLTKLWSLWnsFPFHtFWEGLDGSrLVLIHfP                             |
|               |      |                                                                                                                                                             |
| Hsapiens      | 426  | PGDSYGMQGSVEEVKLVKYNRDKGRVNHSAFLFGDGGGGPTQMLDRLKRLSDTGLPRVQLSSPQLFSALESQSLCTWGWLFLELHNGTYTTAQQIKK-----GNRECEQLHDVEVLSLALARSAQFLYPAALQHLWRLLLLNQF            |
| Mmusculus     | 425  | PGDSYGMQGSVEEVKLVKYNRDKGRVNHSAFLFGDGGGGPTQMLDRLKRLSDTGLPRVQLSSPQLFSALESQSLCTWGWLFLELHNGTYTTAQQIKK-----GNRECEQLHDVEVLSLALARSAQFLYPAALQHLWRLLLLNQF            |
| Rnorvegicus   | 425  | PGDSYGMQGSVEEVKLVKYNRDKGRVNHSAFLFGDGGGGPTQMLDRLKRLSDTGLPRVQLSSPQLFSALESQSLCTWGWLFLELHNGTYTTAQQIKK-----GNRECEQLHDVEVLSLALARSAQFLYPAALQHLWRLLLLNQF            |
| Gallus        | 389  | PGDSYGMQGSVEEVKLVKYNRDKGRVNHSAFLFGDGGGGPTQMLDRLKRLSDTGLPRVQLSSPQLFSALESQSLCTWGWLFLELHNGTYTTAQQIKK-----GNRECEQLHDVEVLSLALARSAQFLYPAALQHLWRLLLLNQF            |
| Xlaevis       | 439  | PGDSYGMQGSVEEVKLVKYNRDKGRVNHSAFLFGDGGGGPTQMLDRLKRLSDTGLPRVQLSSPQLFSALESQSLCTWGWLFLELHNGTYTTAQQIKK-----GNRECEQLHDVEVLSLALARSAQFLYPAALQHLWRLLLLNQF            |
| Tnigroviridis | 432  | PGDSYGMQGSVEEVKLVKYNRDKGRVNHSAFLFGDGGGGPTQMLDRLKRLSDTGLPRVQLSSPQLFSALESQSLCTWGWLFLELHNGTYTTAQQIKK-----GNRECEQLHDVEVLSLALARSAQFLYPAALQHLWRLLLLNQF            |
| consensus     | 466  | PGDSYGMqGsVeevKlVtKYNrDKGRvNhSAfLFGdGGGGpTqMLdRlKRLs TDGLPRvQLSSpQLFsaLeSdSCLtWGWLFleLhNgTYTTaQIKK gNreCEqLHDVEVLSlAlArSa QFLYpAaLqHlWRLlLLnQf              |
|               |      |                                                                                                                                                             |
| Hsapiens      | 577  | HDVITGSCIQVAEDAMYYEYDIRSHGNLISAAAAALCAGEPGPK-----GLLVTNLPWERTVMAIAPKPKG-AHSLALVTVPMSGYAPVPPTSLQPLLPQPVFVQETDGSVTLDNGLIIRVLDPTGQLTSLVVASGREATAEAGLGNQF       |
| Mmusculus     | 576  | HDVITGSCIQVAEDAMYYEYDIRSHGNLISAAAAALCAGEPGPK-----GLLVTNLPWERTVMAIAPKPKG-AHSLALVTVPMSGYAPVPPTSLQPLLPQPVFVQETDGSVTLDNGLIIRVLDPTGQLTSLVVASGREATAEAGLGNQF       |
| Rnorvegicus   | 576  | HDVITGSCIQVAEDAMYYEYDIRSHGNLISAAAAALCAGEPGPK-----GLLVTNLPWERTVMAIAPKPKG-AHSLALVTVPMSGYAPVPPTSLQPLLPQPVFVQETDGSVTLDNGLIIRVLDPTGQLTSLVVASGREATAEAGLGNQF       |
| Gallus        | 543  | HDVITGSCIQVAEDAMYYEYDIRSHGNLISAAAAALCAGEPGPK-----GLLVTNLPWERTVMAIAPKPKG-AHSLALVTVPMSGYAPVPPTSLQPLLPQPVFVQETDGSVTLDNGLIIRVLDPTGQLTSLVVASGREATAEAGLGNQF       |
| Xlaevis       | 593  | HDVITGSCIQVAEDAMYYEYDIRSHGNLISAAAAALCAGEPGPK-----GLLVTNLPWERTVMAIAPKPKG-AHSLALVTVPMSGYAPVPPTSLQPLLPQPVFVQETDGSVTLDNGLIIRVLDPTGQLTSLVVASGREATAEAGLGNQF       |
| Tnigroviridis | 591  | HDVITGSCIQVAEDAMYYEYDIRSHGNLISAAAAALCAGEPGPK-----GLLVTNLPWERTVMAIAPKPKG-AHSLALVTVPMSGYAPVPPTSLQPLLPQPVFVQETDGSVTLDNGLIIRVLDPTGQLTSLVVASGREATAEAGLGNQF       |
| consensus     | 625  | HdVv GScIqV edAmMyYedIrshGn LlSaaaalCagepgpk gllvntlpwertvmaItg gg sLaLVtVpSMgyapvp pTslqPlLPqPvFvqEtDgsVtLdNgIiRvLdPtGQLTSLVvASgREatAeG lGnQf              |
|               |      |                                                                                                                                                             |
| Hsapiens      | 727  | VLFDVPLYNDAWDMYHLERTRKPVLGAGTLAGVTEGGLRGSAWFLLQISPNLSQEVLDVGCPCYRFHTEVHWHAEHFLKVEFPARVRSQAATYEQFGLQRPHTNWSWDNARFEVWHRWMDLSEHFGALALNDCKYGASVRSGL             |
| Mmusculus     | 726  | VLFDVPLYNDAWDMYHLERTRKPVLGAGTLAGVTEGGLRGSAWFLLQISPNLSQEVLDVGCPCYRFHTEVHWHAEHFLKVEFPARVRSQAATYEQFGLQRPHTNWSWDNARFEVWHRWMDLSEHFGALALNDCKYGASVRSGL             |
| Rnorvegicus   | 727  | VLFDVPLYNDAWDMYHLERTRKPVLGAGTLAGVTEGGLRGSAWFLLQISPNLSQEVLDVGCPCYRFHTEVHWHAEHFLKVEFPARVRSQAATYEQFGLQRPHTNWSWDNARFEVWHRWMDLSEHFGALALNDCKYGASVRSGL             |
| Gallus        | 693  | VLFDVPLYNDAWDMYHLERTRKPVLTLLKPEITLAGGLRGSASFSLRSGESSTLQETLLDAMPYICFRTVWQKESHKFLKVEFPVQVRSNATYEQFGLQRPHTNWSWDNARFEVWHRWMDLSEHFGALALNDCKYGASVRSGL             |
| Xlaevis       | 743  | VLFDVPLYNDAWDMYHLERTRKPLTSSYS-KLQISONGGLRVAFTLQISENSTHDEIILDASCPYIRFTKVMNWHAEHFLKVEFPARVRSQAATYEQFGLQRPHTNWSWDNARFEVWHRWMDLSEHFGALALNDCKYGASVRSGL           |
| Tnigroviridis | 732  | VLFDVPLYNDAWDMYHLERTRKPVLEVQPARYASEKPRGVVSTLRLSDKSTFQETLLDAMPYICFRTVWQKESHKFLKVEFPVRSQAATYEQFGLQRPHTNWSWDNARFEVWHRWMDLSEHFGALALNDCKYGASVRSGL                |
| consensus     | 781  | vLFdDvPLyNDawDMYHlERtRkPvLgagTlAgvtEgglRgsaWfLlQIsPnLSqEvLdVgcPcyRfHteVhWHAeHfLkVefParvRSqaATyEQfGHLQrPhTnWSwDnARfEwHrWMDLSEhFGAlALnDcKYgASvRsgVl           |
|               |      |                                                                                                                                                             |
| Hsapiens      | 883  | SLSLLRAPKAPDATADMRHEFTYALMPHKG-----SFDQAGVIAQAYLNFLPALPAPAPATWSAFSVPVAVLETTKQAEKSHQIRTLVRLRYEAHGSHVDCWLHSLPVQEAHLCDLLERPDPAQHLS                             |
| Mmusculus     | 882  | SLSLLRAPKAPDATADMRHEFTYALMPHKG-----SFDQAGVIAQAYLNFLPALPAPAPATWSAFSVPVAVLETTKQAEKSHQIRTLVRLRYEAHGSHVDCWLHSLPVQEAHLCDLLERPDPAQHLS                             |
| Rnorvegicus   | 882  | SLSLLRAPKAPDATADMRHEFTYALMPHKG-----SFDQAGVIAQAYLNFLPALPAPAPATWSAFSVPVAVLETTKQAEKSHQIRTLVRLRYEAHGSHVDCWLHSLPVQEAHLCDLLERPDPAQHLS                             |
| Gallus        | 849  | SLSLLRAPKAPDATADMRHEFTYALMPHKG-----SFDQAGVIAQAYLNFLPALPAPAPATWSAFSVPVAVLETTKQAEKSHQIRTLVRLRYEAHGSHVDCWLHSLPVQEAHLCDLLERPDPAQHLS                             |
| Xlaevis       | 898  | SLSLLRAPKAPDATADMRHEFTYALMPHKG-----SFDQAGVIAQAYLNFLPALPAPAPATWSAFSVPVAVLETTKQAEKSHQIRTLVRLRYEAHGSHVDCWLHSLPVQEAHLCDLLERPDPAQHLS                             |
| Tnigroviridis | 888  | SLSLLRAPKAPDATADMRHEFTYALMPHKG-----SFDQAGVIAQAYLNFLPALPAPAPATWSAFSVPVAVLETTKQAEKSHQIRTLVRLRYEAHGSHVDCWLHSLPVQEAHLCDLLERPDPAQHLS                             |
| consensus     | 937  | sLSllRAPKaDatADmGrHeFYAlMPHkG sFDQAgVIAqAYlnFlPalpap pap tWSAFsVpAVLEtTKQAE qrrsLVRLRYEahGshvdcwLtslPVqEAHLCDLLErpd ghls                                    |
|               |      |                                                                                                                                                             |
| Hsapiens      | 1014 | LQNRKLKTFSPFQVLSLLVLQPPPH                                                                                                                                   |
| Mmusculus     | 1013 | LQNRKLKTFSPFQVLSLLVLQPPPN                                                                                                                                   |
| Rnorvegicus   | 1014 | LQNRKLKTFSPFQVLSLLVLQPPAN                                                                                                                                   |
| Gallus        | 977  | LEQGRKLSFPFQVLSLLVLQ---                                                                                                                                     |
| Xlaevis       | 1026 | LKQGRKLSFPFQVLSLLVLQRR---                                                                                                                                   |
| Tnigroviridis |      |                                                                                                                                                             |
| consensus     | 1093 | l dnrKlKtfsPfqVlSllVlQppH                                                                                                                                   |

### **Supplementary Figure 1: Sequence Comparison of various Man2C1 orthologues:**

Using the protein sequence of human Man2C1, the NCBI sequence database was surveyed to identify Man2C1 orthologues. Among the sequences obtained, sequences from the mouse (Gene Accession No. NP\_082912), rat (P21139), chicken (XP\_413694), frog (AAH70781) and puffer fish (CAF98334) were used for a multiple sequence alignment analysis using Clustal W program (<http://clustalw.genome.jp/>) and the results were formatted with Boxshade 3.21 ([http://www.ch.embnet.org/software/BOX\\_form.html](http://www.ch.embnet.org/software/BOX_form.html)). Hsapiens; human (BC050550), Mmusculus; mouse (NP\_082912), Rnorvegicus; rat (P21139), Ggallus; chicken (XP\_413694), Xlaevis; frog (AAH70781), and Tnigroviridis; pufferfish (CAF98334) Man2C1 orthologues.
